# Supplementary material for: Comment on “trans-1,2-Disiloxybenzocyclobutene, an adequate partner for the auto-oxidation: EPR/spin trapping and theoretical studies” by J. Drujon et al., Phys. Chem. Chem. Phys., 2014, 16, 7513
Source: Royal Society of Chemistry journal article supplement (doi:10.1039/c6cp04187f), 2016-12-21
Supplement: c6cp04187f1.pdf [file c6cp04187f1.pdf]

**Electronic Supplementary Information (ESI)**

**for**

**Comment on "*trans*-1,2-Disiloxybenzocyclobutene, an adequate partner for the auto-oxidation: EPR/spin trapping and theoretical studies" by J. Drujon *et al.*, *Phys. Chem. Chem. Phys.* 2014, 16, 7513**

Hans-Gert Korth,<sup>\*a</sup> Peter Mulder<sup>b</sup> and Thomas Paul<sup>c</sup>

<sup>a</sup> *Institut für Organische Chemie, Universität Duisburg-Essen, Universitätsstr. 7, 45117 Essen, Germany. E-mail: hans-gert.korth@uni-due.de*

<sup>b</sup> *Leiden Institute of Chemistry, Leiden University, PO Box 9502, 2300 RA Leiden, The Netherlands.*

<sup>c</sup> *Heidelberger Druckmaschinen AG, Alte Eppelheimer Strasse 26, 69115 Heidelberg, Germany*

**Table S1** CBS-QB3 computed heats of formation, free energies of formation (kcal mol<sup>-1</sup>) and entropies (cal mol<sup>-1</sup> K<sup>-1</sup>) at  $T = 298$  K.<sup>a</sup>

| Compound <sup>b</sup>                                                   | $\Delta_f H^\circ$        | $\Delta_f G^\circ$ | $S^\circ$ |
|-------------------------------------------------------------------------|---------------------------|--------------------|-----------|
| benzocyclobutene (unsubst.)                                             | 48.64 [48.1] <sup>c</sup> | 66.85              | 74.85     |
| <i>o</i> -quinodimethane (unsubst.)                                     | 61.96 [60.8] <sup>c</sup> | 78.64              | 79.97     |
| conrotatory transition state (unsubst.)                                 | 86.73 [85.1] <sup>c</sup> | 104.50             | 76.29     |
| <b>9a</b> ( <i>trans</i> -BCB)                                          | 33.70                     | 66.22              | 92.0      |
| <b>10a</b> ( <i>cis</i> -BCB)                                           | 34.60                     | 67.10              | 92.1      |
| <b>11a</b> ( <i>E,E</i> - <i>o</i> -QDM)                                | 49.41                     | 80.07              | 98.3      |
| <b>12a</b> ( <i>E,Z</i> - <i>o</i> -QDM)                                | 49.50                     | 80.47              | 97.2      |
| <b>13a</b> (conrot-TS1)                                                 | 69.24                     | 100.65             | 95.8      |
| <b>14a</b> (conrot-TS2)                                                 | 73.21                     | 105.23             | 93.7      |
| <b>15a</b> ( <i>trans</i> -Peroxide)                                    | -17.17                    | 27.96              | 98.8      |
| <b>16a</b> ( <i>cis</i> -Peroxide)                                      | -17.08                    | 28.00              | 99.0      |
| <b>9b</b> ( <i>trans</i> -BCB)                                          | -23.84                    | 19.92              | 105.5     |
| <b>10b</b> ( <i>cis</i> -BCB)                                           | -21.98                    | 21.35              | 104.8     |
| <b>11b</b> ( <i>E,E</i> - <i>o</i> -QDM)                                | -12.60                    | 29.00              | 110.6     |
| <b>12b</b> ( <i>E,Z</i> - <i>o</i> -QDM)                                | -14.87                    | 26.02              | 113.0     |
| <b>13b</b> (conrot-TS1)                                                 | 1.27                      | 44.02              | 106.8     |
| <b>14b</b> (conrot-TS2)                                                 | 12.35                     | 55.26              | 106.2     |
| <b>15b</b> ( <i>trans</i> -Peroxide)                                    | -83.64                    | -27.85             | 112.0     |
| <b>16b</b> ( <i>cis</i> -Peroxide)                                      | -81.63                    | -25.92             | 112.4     |
| <b>17b</b> ( <i>E,E</i> - <i>o</i> -QDM-O <sub>2</sub> -triplet-adduct) | -22.46                    | 29.74              | 124.1     |
| <b>19b</b> ( <i>E,E</i> - <i>o</i> -QDM-O <sub>2</sub> -triplet-TS3)    | -6.15                     | 45.23              | 126.9     |
| <b>9c</b> ( <i>trans</i> -BCB)                                          | -56.18                    | -15.39             | 119.6     |
| <b>10c</b> ( <i>cis</i> -BCB)                                           | -55.02                    | -14.10             | 119.2     |
| <b>11c</b> ( <i>E,E</i> - <i>o</i> -QDM)                                | -45.07                    | -5.34              | 123.2     |
| <b>12c</b> ( <i>E,Z</i> - <i>o</i> -QDM)                                | -46.96                    | -8.05              | 125.9     |
| <b>13c</b> (conrot-TS1)                                                 | -29.93                    | 11.32              | 118.1     |
| <b>14c</b> (conrot-TS2)                                                 | -18.49                    | 22.67              | 118.4     |
| <b>15c</b> ( <i>trans</i> -Peroxide)                                    | -115.81                   | -61.31             | 122.6     |
| <b>16c</b> ( <i>cis</i> -Peroxide)                                      | -113.87                   | -59.49             | 123.1     |
| <b>17c</b> ( <i>E,E</i> - <i>o</i> -QDM-O <sub>2</sub> -triplet-adduct) | -54.51                    | -3.64              | 134.8     |
| <b>19c</b> ( <i>E,E</i> - <i>o</i> -QDM-O <sub>2</sub> -triplet-TS3)    | -41.20                    | 9.59               | 135.1     |
| <b>9d</b> ( <i>trans</i> -BCB)                                          | -154.35                   | -70.75             | 171.7     |
| <b>10d</b> ( <i>cis</i> -BCB)                                           | -152.44                   | -68.40             | 170.2     |
| <b>11d</b> ( <i>E,E</i> - <i>o</i> -QDM)                                | -143.54                   | -60.78             | 174.5     |
| <b>12d</b> ( <i>E,Z</i> - <i>o</i> -QDM)                                | -146.40                   | -63.86             | 175.2     |

<sup>a</sup> Energies and entropies were evaluated as described in: J. W. Ochterski, *Thermochemistry in Gaussian*, Gaussian, Inc., Wallingford, CT, 2000; [http://www.gaussian.com/g\\_whitepap/thermo.htm](http://www.gaussian.com/g_whitepap/thermo.htm). The employed equations refer to the textbook of McQuarrie and Simon: D. A. McQuarrie and J. D. Simon, *Molecular Thermodynamics*, University Science Books, Sausalito, Calif., 1999. <sup>b</sup> Since all 1,2-disubstituted compounds are symmetrically substituted, *meso/rac* is synonymous to *cis/trans*. <sup>c</sup> Experimental values: W. R. Roth and B. P. Scholz, *Chem. Ber.*, 1981, **114**, 3741; W. R. Roth, V. Rekowski, S. Börner and M. Quast, *Liebigs Ann.*, **1996**, 409.

**Table S2.** CBS-QB3-calculated energies (kcal mol<sup>-1</sup>) of *endo*-peroxide (**15a-d**, **16a-d**) formation relative to the parent *trans*-benzocyclobutene (**9a-d**) + <sup>3</sup>O<sub>2</sub> (n.c. = not calculated). Data for the unsubstituted compounds shown for comparison.

| Compound                           | <i>trans</i> -Peroxide<br><b>15</b> |                         | <i>cis</i> -Peroxide<br><b>16</b> |                         |
|------------------------------------|-------------------------------------|-------------------------|-----------------------------------|-------------------------|
|                                    | $\Delta H_{\text{rel}}$             | $\Delta G_{\text{rel}}$ | $\Delta H_{\text{rel}}$           | $\Delta G_{\text{rel}}$ |
| <b>a</b> (R = Me)                  | -50.9                               | -38.3                   | -50.8                             | -38.2                   |
| <b>b</b> (R = OMe)                 | -59.8 <sup>a</sup> (8.9)            | -47.2                   | -57.8 <sup>a</sup> (7.0)          | -45.2                   |
| <b>c</b> (R = OSiH <sub>3</sub> )  | -59.6 <sup>a</sup> (8.7)            | -45.9                   | -57.7 <sup>a</sup> (6.9)          | -44.1                   |
| <b>d</b> (R = OSiMe <sub>3</sub> ) | n.c.                                | n.c.                    | n.c.                              | n.c.                    |
| unsubstituted<br>(R = H)           | -46.9 <sup>b</sup>                  | -35.0 <sup>b</sup>      | -46.9 <sup>b</sup>                | -35.0 <sup>b</sup>      |

<sup>a</sup> The ca. 7–9 kcal mol<sup>-1</sup> gain in reaction energies (in parentheses) for R = OMe, OSiH<sub>3</sub> compared to R = Me is attributed to a double anomeric stabilization effect in the peroxides.

<sup>b</sup> *Cis/trans* (*meso/rac*) do not apply.

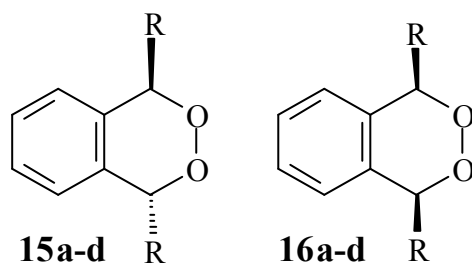

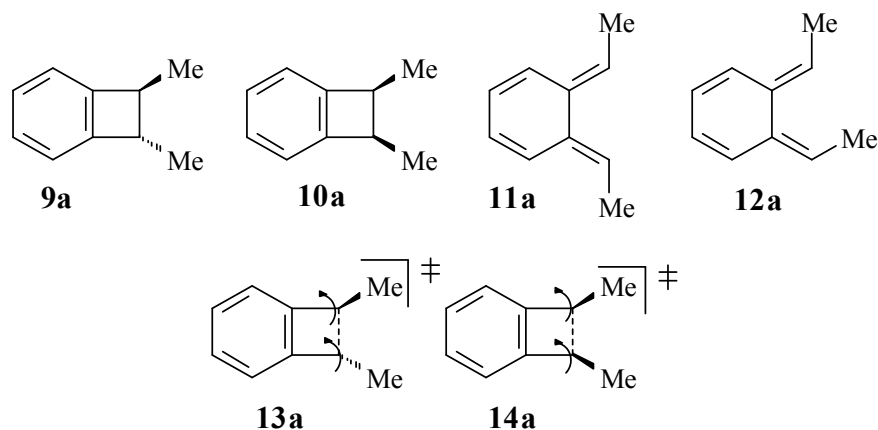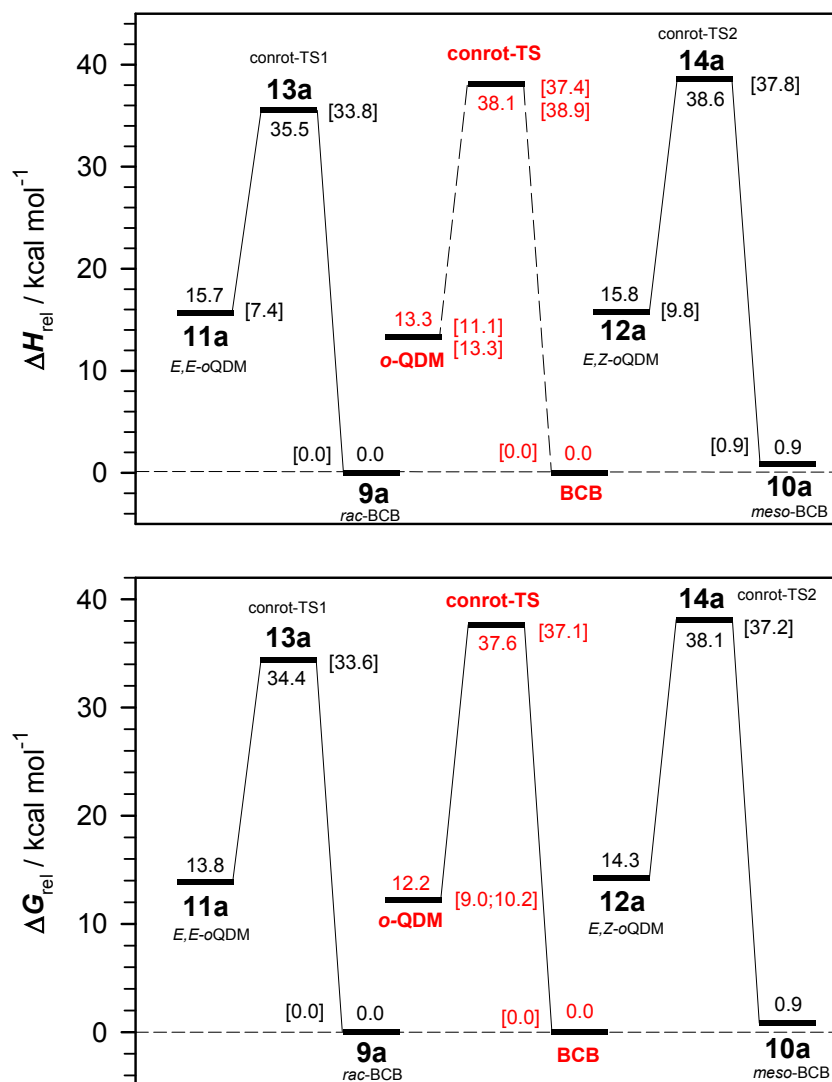

**Figure S1.** CBS-QB3 computed relative enthalpies and free energies of electrocyclic ring opening of *trans*- (left) and *cis*-1,2-dimethyl-benzocyclobutene (right). Center: data (red) for the parent, unsubstituted benzocyclobutene/*o*-quinodimethane (R = H). Experimental data<sup>1</sup> shown in square brackets.

- 1 (a) W. R. Roth, T. Ebbrecht and A. Beitat, *Chem. Ber.*, 1988, **121**, 1357.
- (b) W. R. Roth and B. P. Scholz, *Chem. Ber.*, 1981, **114**, 3741.
- (c) W. R. Roth, V. Rekowski, S. Börner and M. Quast, *Liebigs Ann.*, 1996, 409.

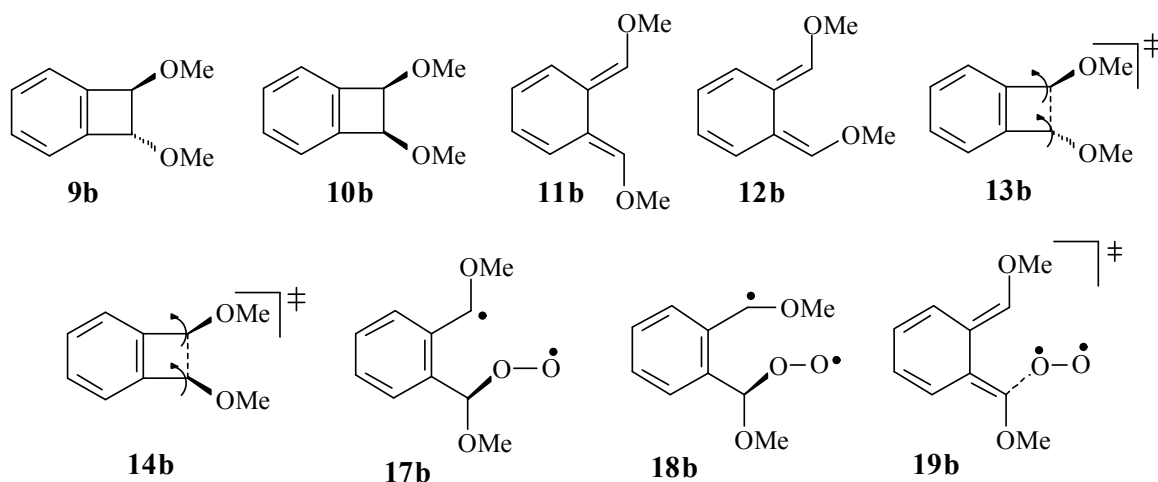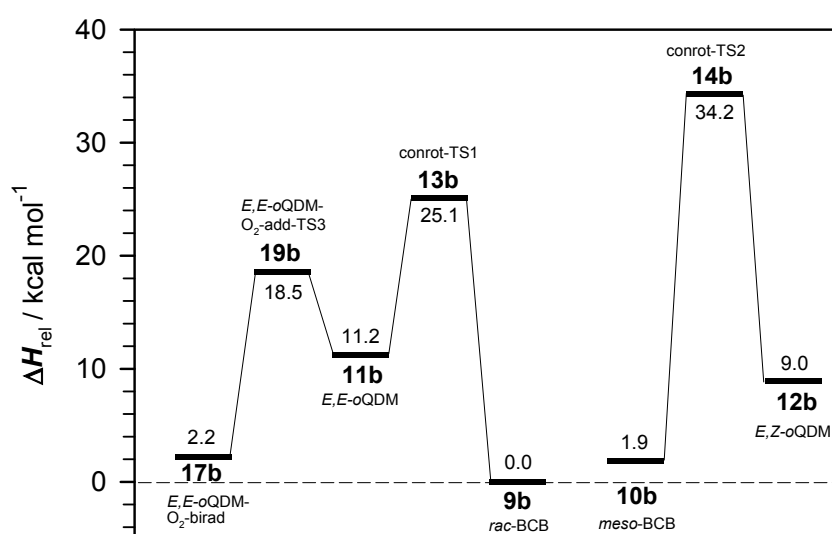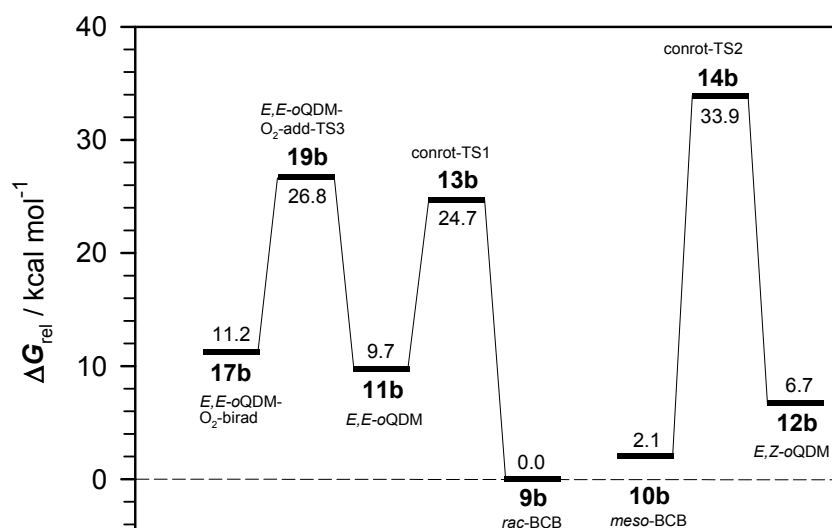

**Figure S2.** CBS-QB3 computed relative enthalpies and free energies of electrocyclic ring opening of *trans*- and *cis*-1,2-dimethoxy-benzocyclobutene and oxygen addition to *E,E*-dimethoxy-*o*-quinodimethane.

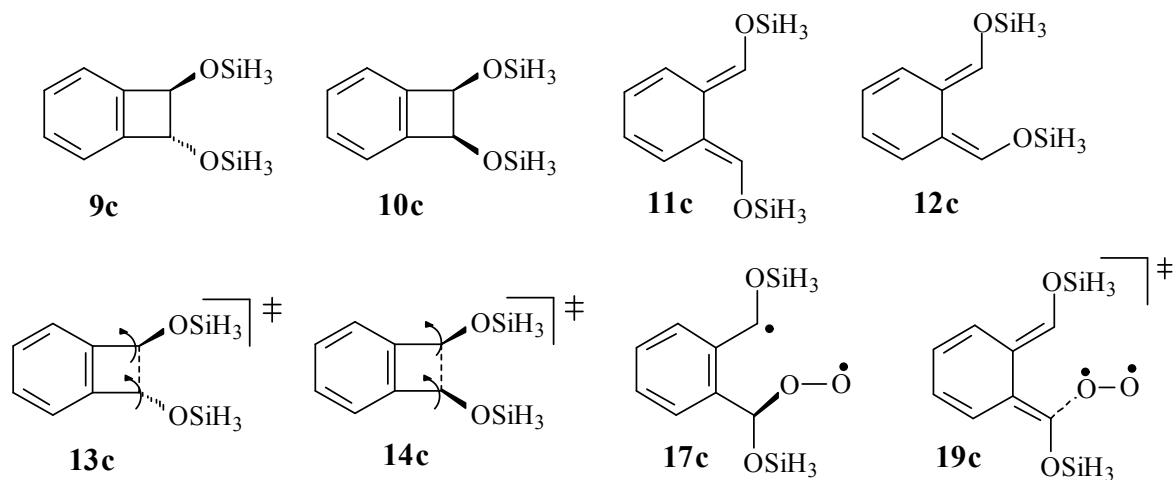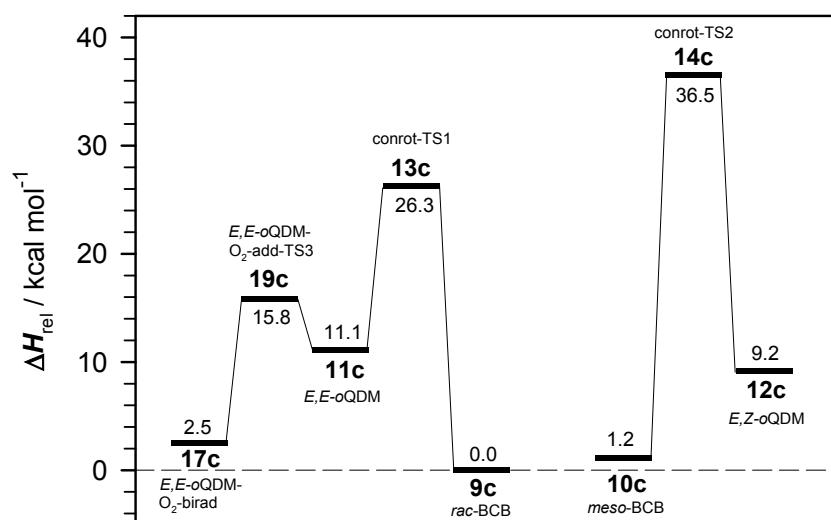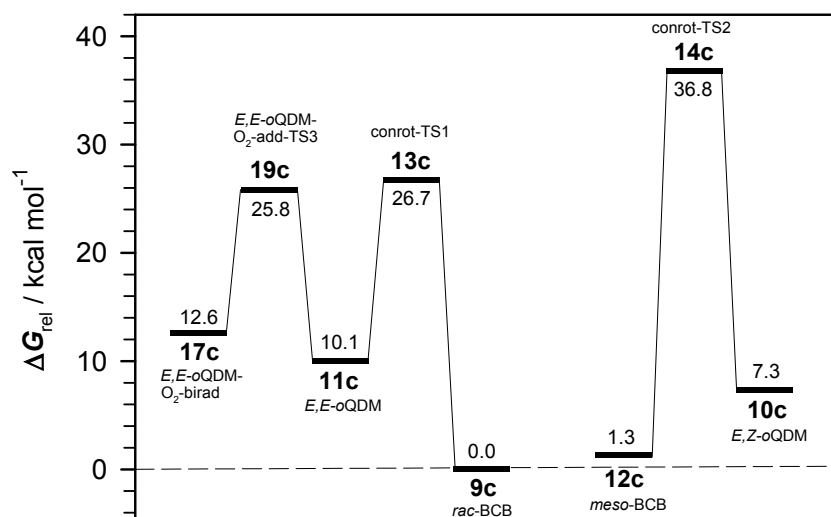

**Figure S3.** CBS-QB3 computed relative enthalpies and free energies of electrocyclic ring opening of *trans*- and *cis*-1,2-di-(trihydrosiloxy)-benzocyclobutene and oxygen addition to *E,E*-di-(trihydrosiloxy)-*o*-quinodimethane.

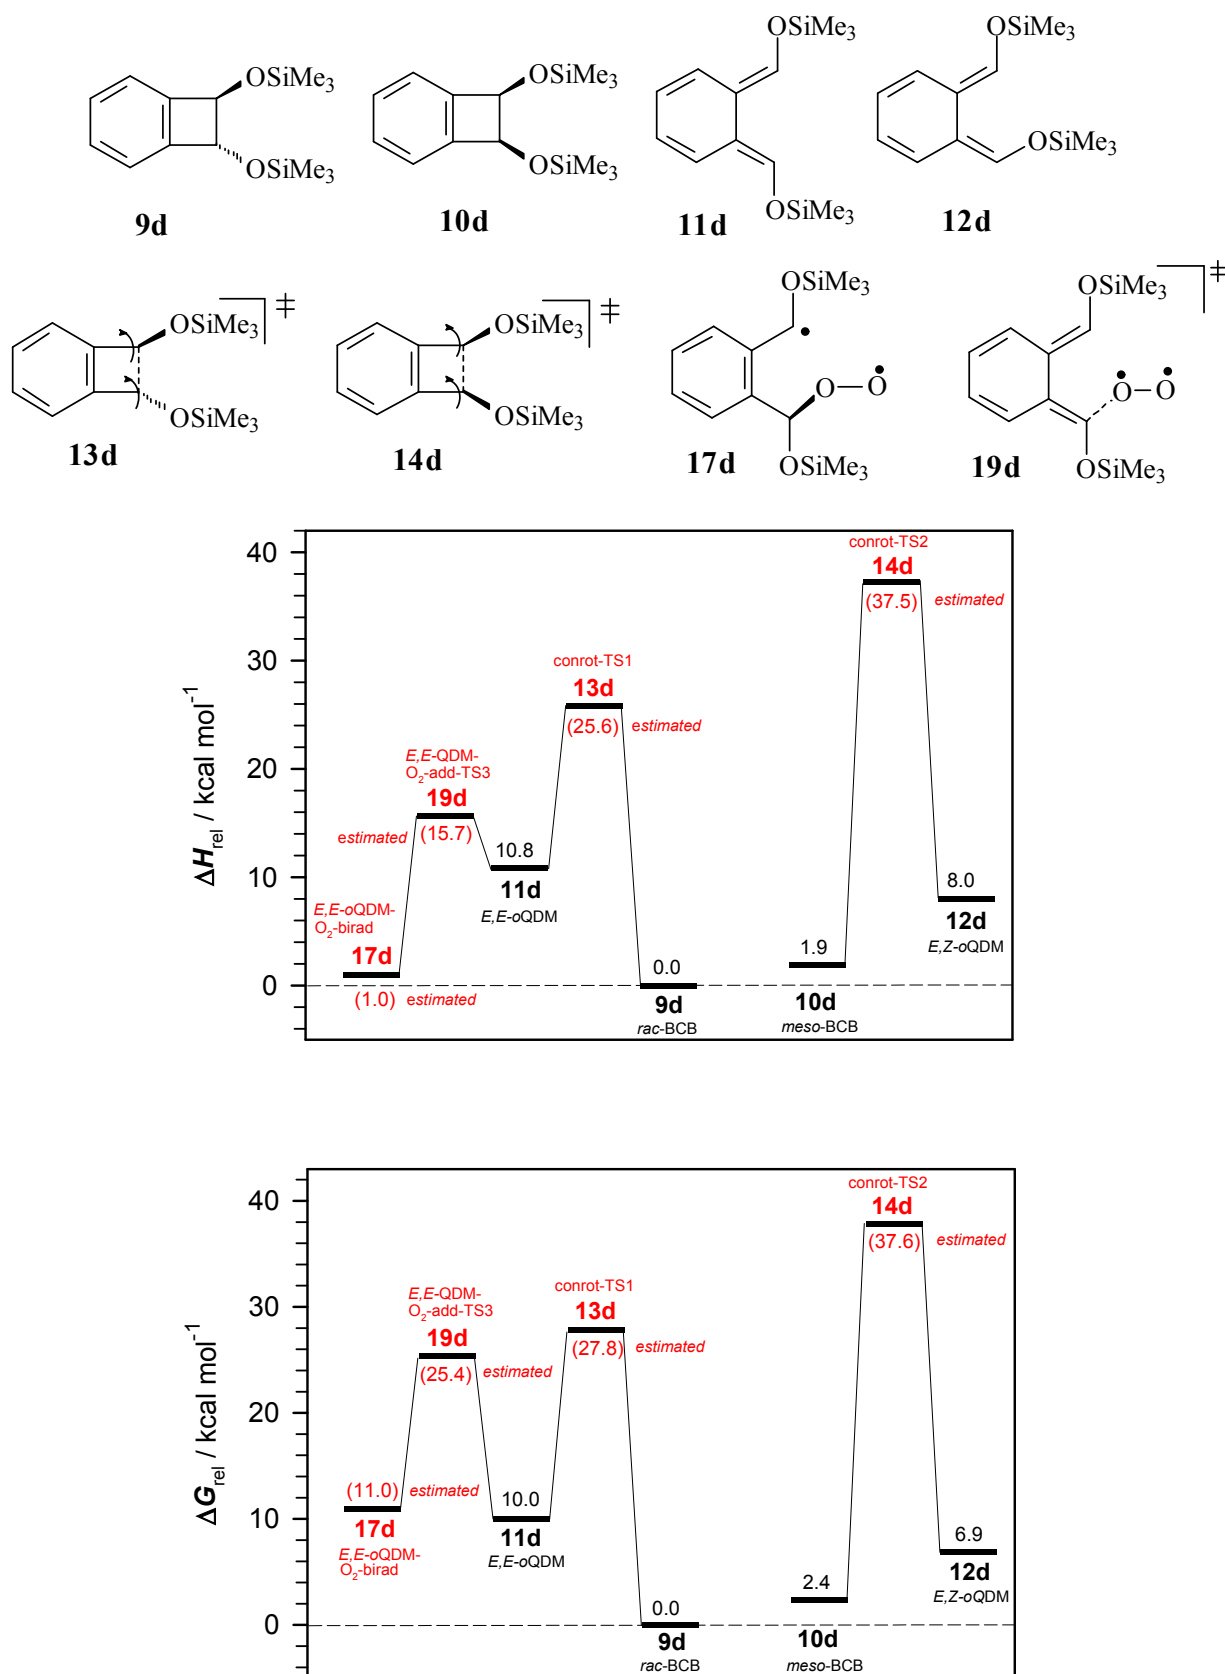

**Figure S4.** CBS-QB3 computed relative enthalpies and free energies (black numbers) of electrocyclic ring opening of *trans*- and *cis*-1,2-di-(trimethylsiloxy)-benzocyclobutene. The “pseudo-CBS-QB3 energies” of 13d, 14d, 17d, and 19d were estimated from the differences of the B3LYP/CBSB7 and CBS-QB3 data of 13a-c, 14a-c, 17b-c, and 19b-c, respectively.

## CBS-QB3 Energies (hartrees)

| Compound | $E^0$       | ZPVE     | $E^0+ZPVE$  | $E^{298}$   | $H^{298}$   | $G^{298}$   |
|----------|-------------|----------|-------------|-------------|-------------|-------------|
| 9a       | -387.667458 | 0.187819 | -387.479639 | -387.470557 | -387.470557 | -387.513338 |
| 10a      | -387.666070 | 0.187861 | -387.478209 | -387.469114 | -387.468170 | -387.511946 |
| 11a      | -387.641290 | 0.185518 | -387.455772 | -387.445545 | -387.444601 | -387.491300 |
| 12a      | -387.641187 | 0.185755 | -387.455432 | -387.445416 | -387.444472 | -387.490655 |
| 13a      | -387.607385 | 0.183746 | -387.423639 | -387.413965 | -387.413021 | -387.458520 |
| 14a      | -387.600948 | 0.183926 | -387.417022 | -387.407638 | -387.406693 | -387.451222 |
| 15a      | -537.919156 | 0.197174 | -537.721982 | -537.711480 | -537.710536 | -537.757476 |
| 16a      | -537.919199 | 0.197358 | -537.721841 | -537.711338 | -537.710394 | -537.757409 |

| Compound | $E^0$       | ZPVE     | $E^0+ZPVE$  | $E^{298}$   | $H^{298}$   | $G^{298}$   |
|----------|-------------|----------|-------------|-------------|-------------|-------------|
| 9b       | -537.930073 | 0.196518 | -537.733555 | -537.722127 | -537.721183 | -537.771294 |
| 10b      | -537.927216 | 0.196707 | -537.730509 | -537.719151 | -537.718207 | -537.768009 |
| 11b      | -537.911594 | 0.194989 | -537.716605 | -537.704232 | -537.703288 | -537.755840 |
| 12b      | -537.915425 | 0.195067 | -537.720358 | -537.707842 | -537.706898 | -537.760586 |
| 13b      | -537.887705 | 0.193890 | -537.693815 | -537.682134 | -537.681190 | -537.731913 |
| 14b      | -537.869441 | 0.193311 | -537.676130 | -537.664486 | -537.663542 | -537.714012 |
| 15b      | -688.196382 | 0.206277 | -687.990105 | -687.977289 | -687.976344 | -688.029578 |
| 16b      | -688.193321 | 0.206376 | -687.986945 | -687.974075 | -687.973130 | -688.026509 |
| 17b      | -688.096382 | 0.201943 | -687.894439 | -687.879820 | -687.878876 | -687.937851 |
| 19b      | -688.068287 | 0.199394 | -687.868893 | -687.853859 | -687.852915 | -687.913190 |

| Compound | $E^0$        | ZPVE     | $E^0+ZPVE$   | $E^{298}$    | $H^{298}$    | $G^{298}$    |
|----------|--------------|----------|--------------|--------------|--------------|--------------|
| 9c       | -1040.051964 | 0.171900 | -1039.880064 | -1039.866767 | -1039.865823 | -1039.922640 |
| 10c      | -1040.050152 | 0.171981 | -1039.878171 | -1039.864914 | -1039.863970 | -1039.920588 |
| 11c      | -1040.033394 | 0.170219 | -1039.863175 | -1039.849075 | -1039.848131 | -1039.848131 |
| 12c      | -1040.036648 | 0.170454 | -1039.866194 | -1039.852082 | -1039.851138 | -1039.910955 |
| 13c      | -1040.007522 | 0.169278 | -1039.838244 | -1039.824964 | -1039.824020 | -1039.880109 |
| 14c      | -1039.988714 | 0.168574 | -1039.820140 | -1039.806737 | -1039.805793 | -1039.862028 |
| 15c      | -1190.317780 | 0.181692 | -1190.136088 | -1190.121653 | -1190.120709 | -1190.121653 |
| 16c      | -1190.314824 | 0.181799 | -1190.133025 | -1190.118553 | -1190.117609 | -1190.176076 |
| 17c      | -1190.217391 | 0.177265 | -1190.040126 | -1190.024016 | -1190.023072 | -1190.087126 |
| 19c      | -1190.193928 | 0.174761 | -1190.019167 | -1190.002828 | -1190.001884 | -1190.066065 |

| Compound | $E^0$        | ZPVE     | $E^0+ZPVE$   | $E^{298}$    | $H^{298}$    | $G^{298}$    |
|----------|--------------|----------|--------------|--------------|--------------|--------------|
| 9d       | -1275.688375 | 0.341188 | -1275.347187 | -1275.322986 | -1275.322042 | -1275.403601 |
| 10d      | -1275.685279 | 0.341191 | -1275.344088 | -1275.319947 | -1275.319003 | -1275.399847 |
| 11d      | -1275.670327 | 0.339570 | -1275.330757 | -1275.305782 | -1275.304838 | -1275.387727 |
| 12d      | -1275.675050 | 0.339729 | -1275.335321 | -1275.310335 | -1275.309391 | -1275.392636 |



**Full citation of ref. 14:**

*Gaussian 09*, Revision A.02,  
M. J. Frisch, G. W. Trucks, H. B. Schlegel, G. E. Scuseria,  
M. A. Robb, J. R. Cheeseman, G. Scalmani, V. Barone, B. Mennucci,  
G. A. Petersson, H. Nakatsuji, M. Caricato, X. Li, H. P. Hratchian,  
A. F. Izmaylov, J. Bloino, G. Zheng, J. L. Sonnenberg, M. Hada,  
M. Ehara, K. Toyota, R. Fukuda, J. Hasegawa, M. Ishida, T. Nakajima,  
Y. Honda, O. Kitao, H. Nakai, T. Vreven, J. A. Montgomery, Jr.,  
J. E. Peralta, F. Ogliaro, M. Bearpark, J. J. Heyd, E. Brothers,  
K. N. Kudin, V. N. Staroverov, R. Kobayashi, J. Normand,  
K. Raghavachari, A. Rendell, J. C. Burant, S. S. Iyengar, J. Tomasi,  
M. Cossi, N. Rega, J. M. Millam, M. Klene, J. E. Knox, J. B. Cross,  
V. Bakken, C. Adamo, J. Jaramillo, R. Gomperts, R. E. Stratmann,  
O. Yazyev, A. J. Austin, R. Cammi, C. Pomelli, J. W. Ochterski,  
R. L. Martin, K. Morokuma, V. G. Zakrzewski, G. A. Voth,  
P. Salvador, J. J. Dannenberg, S. Dapprich, A. D. Daniels,  
O. Farkas, J. B. Foresman, J. V. Ortiz, J. Cioslowski,  
and D. J. Fox, Gaussian, Inc., Wallingford CT, 2009.
